# Supplementary material for: InDel Markers Based on 3K Whole-Genome Re-Sequencing Data Characterise the Subspecies of Rice (Oryza sativa L.)
Source: MDPI journal article supplement (doi:10.3390/agriculture11070655), 2021-07-11
Supplement: s1 [file s1]

Archive with 5 entries (5 files):
- Supplementary Figures.pdf
- Table S1.xlsx
- Table S2.xlsx
- Table S3.xlsx
- Table S4.xlsx
