# Supplementary material for: InDel Markers Based on 3K Whole-Genome Re-Sequencing Data Characterise the Subspecies of Rice (Oryza sativa L.)
Source: MDPI journal article supplement (doi:10.3390/agriculture11070655), 2021-07-11
Supplement: s1 [file s1 › Supplementary Figures.pdf]

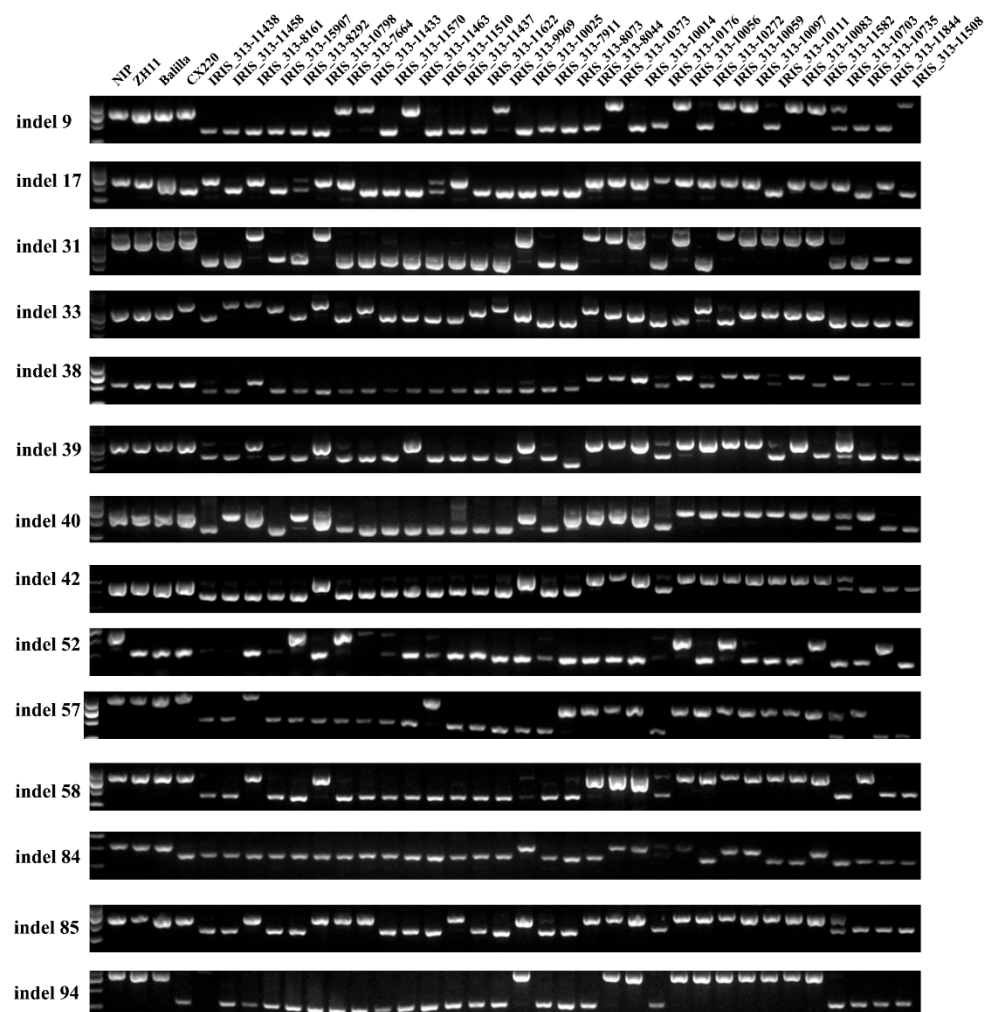

Figure S1. PCR amplification patterns of the InDel markers that could discriminate varieties in japonica rice. M: DL2000, DNA marker. Nipponbare was used as a control.

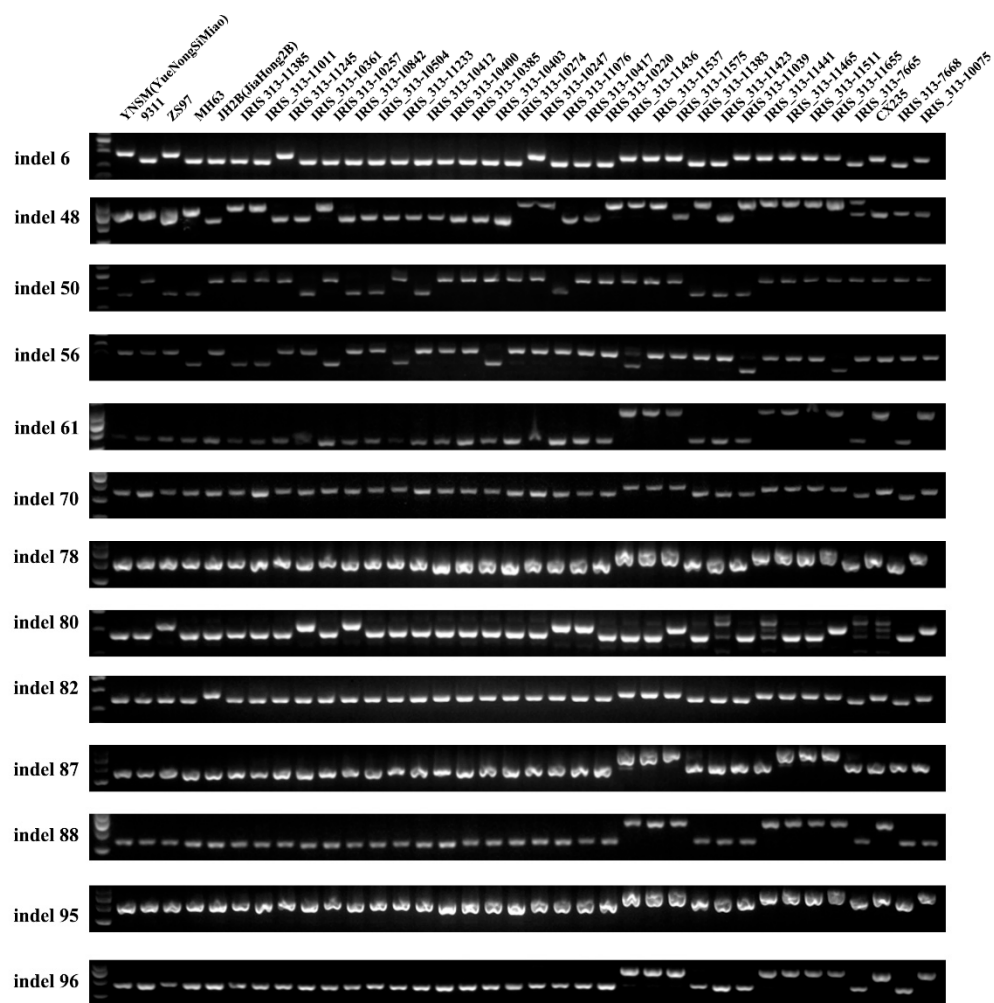

Figure S2. PCR amplification of 36 indica rice varieties using the 26 InDel markers. M: DL2000, DNA marker. YNSM(YueNongSiMiao) was used as a control.

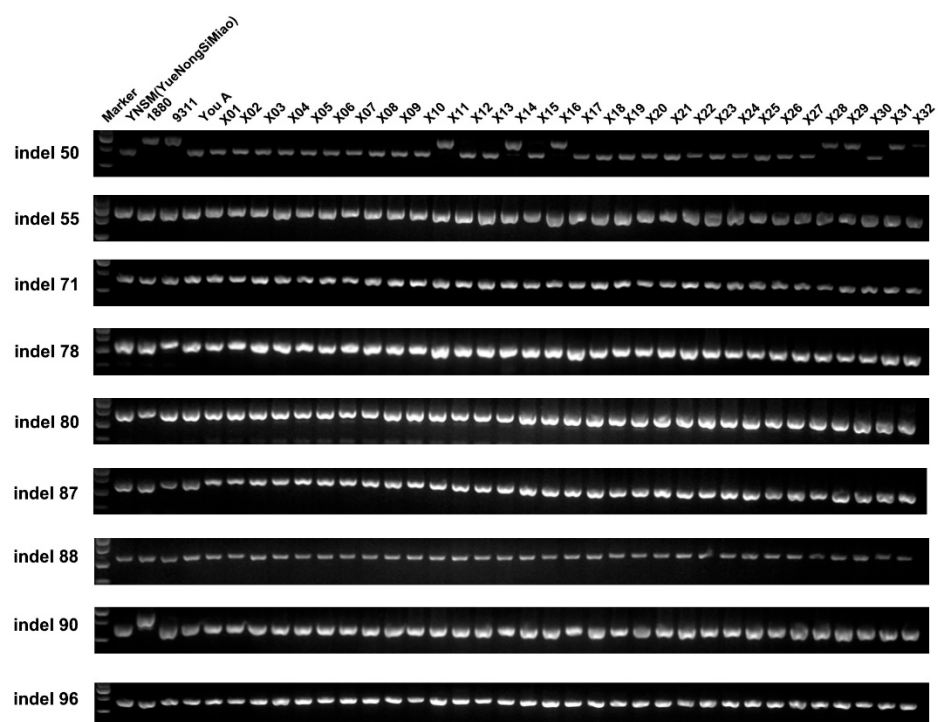

**Figure S3.** PCR amplification of the recombinant inbred lines (RILs) population. M: DL2000, DNA marker. YNSM(YueNongSiMiao) was used as a control.
