# Supplementary material for: InDel Markers Based on 3K Whole-Genome Re-Sequencing Data Characterise the Subspecies of Rice (Oryza sativa L.)
Source: MDPI journal article supplement (doi:10.3390/agriculture11070655), 2021-07-11
Supplement: s1 [file s1 › Table S1.xlsx]

## Sheet: Table.S1
Table S1 The Indica and japonica rice materials in this study
Rice accessions	Subspecies	Country of origin
NIP	japonica	China
ZH11	japonica	China
Balilla	japonica	Italiana
CX220	japonica	NA
IRIS_313-11438	japonica	Mexico
IRIS_313-11458	japonica	India
IRIS_313-8161	japonica	NA
IRIS_313-15907	japonica	NA
IRIS_313-8292	japonica	NA
IRIS_313-10798	japonica	Indonesia
IRIS_313-7664	japonica	NA
IRIS_313-11433	japonica	India
IRIS_313-11570	japonica	China
IRIS_313-11463	japonica	Philippnes
IRIS_313-11510	japonica	Srilanka
IRIS_313-11437	japonica	Mexico
IRIS_313-11622	japonica	China
IRIS_313-9969	japonica	Srilanka
IRIS_313-10025	japonica	Madagascar
IRIS_313-7911	japonica	NA
IRIS_313-8073	japonica	NA
IRIS_313-8044	japonica	NA
IRIS_313-10373	japonica	Philippines
IRIS_313-10014	japonica	Italy
IRIS_313-10176	japonica	Thailand
IRIS_313-10056	japonica	Japan
IRIS_313-10272	japonica	Colombia
IRIS_313-10059	japonica	South Korea
IRIS_313-10097	japonica	South Korea
IRIS_313-10111	japonica	Italy
IRIS_313-10083	japonica	Spain
IRIS_313-11582	japonica	China
IRIS_313-10703	japonica	Malaysia
IRIS_313-11735	japonica	China
IRIS_313-11844	japonica	Thailand
IRIS_313-11508	japonica	Thailand
YNSM(YueNongSiMiao)	indica	China
9311	indica	China
ZS97	indica	China
MH63	indica	China
JH2B(JiaHong2B)	indica	China
IRIS 313-11385	indica	Philippines
IRIS_313-11011	indica	Indonesia
IRIS 313-11245	indica	India
IRIS_313-10361	indica	Philippines
IRIS 313-10257	indica	Nicaragua
IRIS_313-10842	indica	Indonesia
IRIS_313-10504	indica	China
IRIS_313-11233	indica	Thailand
IRIS 313-10412	indica	Indonesia
IRIS 313-10400	indica	Colombia
IRIS 313-10385	indica	Philippines
IRIS_313-10403	indica	Philippines
IRIS 313-10274	indica	Guatemala
IRIS 313-10247	indica	Cuba
IRIS 313-11076	indica	Laos
IRIS 313-10417	indica	India
IRIS 313-10220	indica	Brazil
IRIS_313-11436	indica	Ivory Coast
IRIS_313-11537	indica	Philippines
IRIS_313-11575	indica	China
IRIS_313-11383	indica	Vietnam
IRIS_313-11423	indica	Philippines
IRIS 313-11039	indica	China
IRIS_313-11441	indica	Philippines
IRIS_313-11465	indica	Philippines
IRIS_313-11511	indica	Philippines
IRIS_313-11655	indica	China
IRIS_313-7665	indica	Colombia
CX235	indica	Philippines
IRIS 313-7668	indica	Indonesia
IRIS_313-10075	indica	Japan
