# Supplementary material for: InDel Markers Based on 3K Whole-Genome Re-Sequencing Data Characterise the Subspecies of Rice (Oryza sativa L.)
Source: MDPI journal article supplement (doi:10.3390/agriculture11070655), 2021-07-11
Supplement: s1 [file s1 › Table S2.xlsx]

## Sheet: Table.S2
Table S2 The recombination group inbred line progeny used in this study
Rice accessions	Subspecies
1880	indica
9311	indica
YouA	indica
X01	indica
X02	indica
X03	indica
X04	indica
X05	indica
X06	indica
X07	indica
X08	indica
X09	indica
X10	indica
X11	indica
X12	indica
X13	indica
X14	indica
X15	indica
X16	indica
X17	indica
X18	indica
X19	indica
X20	indica
X21	indica
X22	indica
X23	indica
X24	indica
X25	indica
X26	indica
X27	indica
X28	indica
X29	indica
X30	indica
X31	indica
X32	indica
