# Supplementary material for: InDel Markers Based on 3K Whole-Genome Re-Sequencing Data Characterise the Subspecies of Rice (Oryza sativa L.)
Source: MDPI journal article supplement (doi:10.3390/agriculture11070655), 2021-07-11
Supplement: s1 [file s1 › Table S3.xlsx]

## Sheet: Sheet1
Table S3. Chromosomal position and primer sequence for 96 InDel markers uesd in this studyNipponbare (MSU7/IRGSP1.0)
Name	Forward primer (+)	Reverse primer (-)	Tm(℃)	product length(bp)	Chromosomal position
InDel1	ATTAGGAAGAAGGTCGGG	CATAAACTTACGGATGTCA	63.4	375	Chr1:2332444-2332706
InDel2	CTTGCCATCGAGGAGAAT	GGGTGGTGGTTTAGGATT	65	516	Chr1:6978535-6978810
InDel3	TTTTCAGGGAGTGGAGAT	AACTTGCGAGTGTTTACC	59.3	670	Chr1:10937394-10937617
InDel4	GGGAGCGAACATTCTTGT	TGCAGCAAATGCCTTATT	63.4	447	Chr1:17597272-17597950
InDel5	GCATTGTAAGGTTTGGTT	CCTCGGAACGTGATAGTT	59.3	502	Chr1:22255991-22256364
InDel6	TACAAAGGTAGTAACAGC	CACCCAATAGAATTAAACAT	50.2	432	Chr1:26289041-26289407
InDel7	GAAAGAGCCCCGATGGAAGA	ACACCACCTAGTATCTCCCT	64.4	752	Chr1:31036956-31037192
InDel8	TAACGAGGAACATAGGAG	AGAAGAATAGCGACAAAC	56.4	569	Chr1:34350339-34350596
InDel9	AACCTGTAAATAGGGATG	GTGGTCCAAATACAACTA	50.2	613	Chr1:38400060-38400283
InDel10	GAATGCGATATTTCAAAA	TAGGTAGGGGAGAAGAAC	53	788	Chr1:40704482-40704608
InDel11	ATGCCCAGATCCCCTTCA	TGTCCGTCCGGAGTACGA	64.4	765	Chr1:42959848-42959954
InDel12	AGGTGGAGCCAAGCAGTT	TTGTCCCGGTTGGTTGAT	59.3	499	Chr2:617517-618377
InDel13	GCTGAACTTTTATGACTA	GGTCTTGTTGTAAAGATT	50.2	398	Chr2:7043360-7043599
InDel14	TGTATACCCCGCTCCTAA	TCATAAGCAGCCAAGGTG	56.4	694	Chr2:9068539-9068756
InDel15	CCTCACAGATTGCCAAGG	AAGACAACGAAAACGACC	63.4	656	Chr2:13081759-13081941
InDel16	TCACCGATCCTCCTACCC	TTTGCACTGCCGAAAGAA	56.4	438	Chr2:18534780-18535216
InDel17	GTGCAAGATGTGCCTGAC	ATCTCCACCATCACCCTA	59.3	523	Chr2:22591497-22591719
InDel18	ATATTTTGCGGATACATTG	TGTTCAACTCACCTTCCA	46.3	601	Chr2:26005840-26006002
InDel19	GCATTTCTTGATTGATTTGCTC	GACTTTGCAGCCGGGATA	59.3	624	Chr2:29814665-29814903
InDel20	TGGCACAGGAGTGCTTACAT	CAGTGGCTCTTGTTGAAATG	59.3	553	Chr2:34790823-34791067
InDel21	TTTTGTGCGAGTTTTAGC	CACGAATCTGGAATCTGA	56.4	673	Chr3:3083702-3083752
InDel22	TAGCAACATCTACTACACC	GTTATTGTTCTTCCTTGT	50.2	422	Chr3:6154034-6154395
InDel23	ATCGTCGCCACCTTGTTC	GGTAGCACGTTGGAGCAG	64.4	380	Chr3:11487044-11487595
InDel24	TGGTTAGTGGAAAGGGTTAGTG	GGAACGTGACCTACGCATC	63.4	405	Chr3:15221056-15221208
InDel25	CATCAGTATCCACCTTCA	AATTTGTGGCTGTTACGC	63.4	514	Chr3:19008065-19008285
InDel26	TGTTGCCGCCACTTTCAT	CTGGTCATAGTGTTTTGG	56.4	603	Chr3:22819704-22820217
InDel27	CACCTCTTATTTGAATTTCGTC	AGGGGAGTGAAGCCGTGA	59.3	488	Chr3:26657316-26657532
InDel28	ATATCGTTGGTTACTTTATG	TTGTGCTCATTGGAACTT	56.4	978	Chr3:30838565-30838700
InDel29	TAATTAACAGTGCCAACC	TTTCAAAAGAAGAGGGTA	59.3	437	Chr3:34049257-34050152
InDel30	CAAATTGGCTTTCTGTTA	AATGCTCATGGTCCTTAC	65	419	Chr3:35754902-35755602
InDel31	AAACTTTAAAATCAGCTC	ACTATGACATGAGGTAGC	53	1156	Chr4:3561263-3561596
InDel32	CCCAACCCATTAGTCATC	ATCAAGCTATCGTGATCGTA	65	863	Chr4:5911717-5912038
InDel33	CTAGTGACGCTCATTTCA	GCAACCTCCAACTGCTAC	56.4	752	Chr4:9224199-9224271
InDel34	AACTATGATGCTGCGGATTC	AGCCCATACGAGCAAAAG	59.3	564	Chr4:13659794-13660479
InDel35	TTCGACGCACATTCAACATA	GGTCGTGCATGGCCCAGTTT	65	366	Chr4:18472947-18473216
InDel36	TAAATAAGGACCACCAAT	GAAACAATTTTACTAGCCT	53	423	Chr4:21348754-21349717
InDel37	ATCGCCCTTGGTTTGTTC	CGGATGGCTGAGATTTGT	59.3	348	Chr4:24924870-24925071
InDel38	ATGGTACAGGCGAGTATGG	TTGTCCGTTTAAGGGAGG	59.3	412	Chr4:30184362-30184639
InDel39	ATCGCCTTTGATCTGCTA	GTGCCGATTCTTTGGATT	56.4	769	Chr4:34501255-34501817
InDel40	TTCATTTATACGCTGGCTCG	CGCCCATACCAGAATGTTT	56.4	476	Chr5:2328543-2328717
InDel41	CATGCGTCGCCGTCATGC	ATCCCCGCCGTCCAATCT	64.4	396	Chr5:6818934-6819117
InDel42	GTGCCAAGATAATAAGTGA	CAGCCATAGCCAGTGAAT	50.2	616	Chr5:8042902-8043413
InDel43	AGACGAATTTATTAAGCC	TCATTTCTCATCACAGCA	53	678	Chr5:14933072-14933896
InDel44	GAGGGTTATGATTGGTTG	AGCCTTGTAAGTTTTGGT	56.4	550	Chr5:18026819-18027032
InDel45	CTTCCCTAACAAAATCAG	AAGAATCAAGCATAGCAT	50.2	516	Chr5:21763666-21763869
InDel46	CTCAATCCAAACAAACAC	GGGGATAGCCTTATAGTA	56.4	1082	Chr5:29002647-29002756
InDel47	CCAAATGAGCCCGTAAAT	TAGCCGGATACTCCAGAC	59.3	741	Chr6:3039584-3039925
InDel48	TTCTCCCGCTGCTTGTTC	ACCACTATTCCCATCATTT	56.4	550	Chr6:6061395-6061653
InDel49	GTACTAGGAAATGCCACG	TGCTCTGTTTACCTTGAT	65	550	Chr6:10110751-10110989
InDel50	TTATGGCCTTTCACCTAT	TAATTTGGGCTCACAACA	63.4	583	Chr6:13294591-13294719
InDel51	CGCCTCATCCTCCTCCAA	GTGCTGCATCAAAGTGATAGAA	65	522	Chr6:17053620-17054230
InDel52	AATTTTGCTTTTGACCATG	AGGATAGATCCCTTACTT	56.4	673	Chr6:20931079-20931696
InDel53	CGTAGCAGGTAGACTGGG	ACTGTATCGTTTGAGGAGC	65	631	Chr6:24214661-24215025
InDel54	ATCGACATGCCTAATCTT	GCTTACTAACAAATACCGT	56.4	758	Chr6:28753798-28753879
InDel55	TCGGCAGCATTCATCACG	AGGCACCACATTGCGAGA	63.4	895	Chr7:2251233-2252222
InDel56	AGACGGAGTTCAGGATCA	CGTGCTTTTCTTCAGGTT	65	565	Chr7:5840626-5840863
InDel57	ACCAATATCATCATCTTA	CATTTCAGACCAACATTA	46.3	668	Chr7:8545844-8545920
InDel58	GTGATTACTGCCTTGAGA	TGCCCTTCAGGTTGCTATT	65	662	Chr7:12566250-12566356
InDel59	AATCGAGGATTCAACGAG	AAATGTCCCTGTCTATCTGT	63.4	461	Chr7:16378761-16378970
InDel60	CCGCTTGTAGGTGACGAA	GTGAACTGATCGGGTTGGT	65	398	Chr7:19737282-19737466
InDel61	ATGGCACTTAGAACAGAC	AATACCAAATGGACAACA	55.6	1011	Chr7:23393185-23393667
InDel62	CAAGTCCATTGGGCAACT	GAACTGGTGGAGCTTTGT	63.4	374	Chr7:27567130-27567538
InDel63	GGATTAATCTGATATTTTAG	ATTTTCCATTTCCTGTAT	56.4	613	Chr8:2762383-2763260
InDel64	AAAATGAAGATTGCCACTAC	CTGGCTCTTGAAGGAGTA	65	572	Chr8:5133417-5133654
InDel65	TAACTGAAGGACTGACCACCAC	GGTAGATTTCCACCAGAAGG	61.3	307	Chr8:8423618-8423854
InDel66	AACGATTACTAGCCAACT	TCTCCCTCTTCTTTTATT	50.2	630	Chr8:13055346-13055475
InDel67	GCCACATCAGCGAAACCA	GCCCATTACCGGACCATT	64.4	741	Chr8:17406119-17406356
InDel68	TATGAAACGAAAGGAGTAGC	TAACCTGAGACGGAGGAAGT	64.4	325	Chr8:21312466-21312755
InDel69	TTGCTATTATCCATGTTTGA	CATTTACATTAGATGGTGCA	53	738	Chr8:26382493-26382841
InDel70	TTTATCAACTTCACCCCACG	TGACACCCATAGGTATCAGA	61.3	311	Chr9:2349885-2350022
InDel71	AGGTTTGTGGGTTTATTTC	TTCATTCCTGCGGTGTTC	56.4	683	Chr9:5443614-5444438
InDel72	AAACGGAAGTTGAATGGG	TCGCTTATGATGGGACAA	53	720	Chr9:8701947-8702561
InDel73	GGTGGTCTGCTTCTGATA	ATACACGCACAATTGAAA	53	393	Chr9:13424028-13424080
InDel74	TGACCAAAGATAAGAGGA	GAAAAGAAAAGGGGAAAA	53	710	Chr9:17108219-17108445
InDel75	TAGGATGGGTAGGTTGTA	TAGTCGGTAGTCGTTCTT	53	534	Chr9:20360060-20360129
InDel76	TACCCGCAAAGGGACAAG	TACAATGCGTGCGTTTAA	50.2	583	Chr10:2064284-2064944
InDel77	TTGACATGGCAGCCCTAA	ATCGCCCAGCCTTTCTAC	53	611	Chr10:5491109-5491456
InDel78	GGATTGGTCACGAGGTCA	GCCCGTGGGAGAAGAAAA	59.3	539	Chr10:9997907-9998229
InDel79	TAACCGAACATAGTCTAAAG	ACTTACAACCTTGTCATCAT	56.4	512	Chr10:14073260-14073675
InDel80	CACCAAGTCACCAACCAT	TAGCCCCTACTTCTTCCA	53	503	Chr10:17498899-17499034
InDel81	TTAGAATTAAACCCTACCAC	ATCCATTACCTAGCCATC	53	409	Chr10:21005789-21005940
InDel82	GTTCACGGTTTGATTGGT	CATCGGAGGCATAGTTATT	56.4	397	Chr11:1920490-1920649
InDel83	GTTGTATTTCTTCTAGCCAATG	AAGTGTCAACCCACATCAA	61.5	547	Chr11:5348081-5348345
InDel84	TATTCGTTTAGATTCGTAG	GAGCTTGTTTTGGTGTAT	53	500	Chr11:10085923-10086447
InDel85	TTCCTGTTTCTCGCAATG	GGTTATCTGAATTTGAGGGTAT	56.4	492	Chr11:13182953-13183182
InDel86	CTGCCCAATACTTCCTCC	CTTCGACTTCGATACCTT	61.5	1099	Chr11:17061459-17061933
InDel87	ATTAAAGTTCGATAAAGC	GTGTATGTAGTATTTGCTCT	53	580	Chr11:20765587-20765732
InDel88	TTCAATTAAGCGATGAGA	TATGCCTAGTTATTTTCTG	53	529	Chr11:24396038-24396256
InDel89	AGACCAACTCGGCCATCT	ACCGGTGATCTTTCTGGACTGT	64.4	914	Chr11:27767762-27767993
InDel90	GGTCGGCTGGGACAATCT	TCGCCATCAATACACCTTAC	56.4	560	Chr12:1925349-1925441
InDel91	AGAGGTGCTAGATTTGGT	CTGTGGTGACTTGGGAGT	64.4	648	Chr12:5512975-5513706
InDel92	AACTTAACTGAGGGTGTAT	GTTCCAATTTCAACTAAAC	53	752	Chr12:9868138-9868377
InDel93	GCTGCGATCAAATTCTGG	GATTAGCACGGGCTTCTT	63.4	621	Chr12:13822063-13822307
InDel94	CATTCGAGTTCGTGCTAC	ATTCAGCCTCCAATAAGC	61.5	925	Chr12:17784690-17785392
InDel95	ACGTATCGCCTCCCAAGG	CGAGGGAAAGGAAAACATC	59.3	572	Chr12:21877210-21877277
InDel96	CTTGCTGGATTGGCTTGG	TCGCTTTTGGAACTACCT	59.3	716	Chr12:25812771-25812826
