# Supplementary material for: InDel Markers Based on 3K Whole-Genome Re-Sequencing Data Characterise the Subspecies of Rice (Oryza sativa L.)
Source: MDPI journal article supplement (doi:10.3390/agriculture11070655), 2021-07-11
Supplement: s1 [file s1 › Table S4.xlsx]

## Sheet: Sheet1
Table S4 Chromosomal position and primer sequence for 108 new InDel markers (MSU7/IRGSP1.0)
Name	Forward primer (+)	Reverse primer (-)	Tm(℃)	product length(bp)	Chromosomal position
C-InDel1	CATGATGATGCCCTAATGTC	AATGTTGCTTGCCAAGAAGA	50.6	582	Chr01:1793886-1794655
C-InDel2	CCGTTGATGTTGGATTGGTG	CGCTATTCCCTGCATGGTCT	53.4	329	Chr01:5425904-5426400
C-InDel3	GCCGGGTTTGGTGATTAGCG	ATCGAAAGCTGCGACGACTA	51.6	497	Chr01:8985384-8986120
C-InDel4	ATAAAACCCCACCTATTACG	TTCAAGTTCTACGATCACAT	45.9	998	Chr01:12678601-12679777
C-InDel5	GGGACACGGCTTCCTTGCTG	CCATGCTGCTGTGGCGAACA	56.6	285	Chr01:16232455-16232937
C-InDel6	GTTTGTGGGTTTGGAAGATG	ATTGCAGAATGGCGTAACTG	50.1	397	Chr01:19011525-19012176
C-InDel7	TCCAACAGGGAGTAGGAGGC	ACCTATGGGCTGGTATTTCG	51.9	826	Chr01:23442611-23443538
C-InDel8	GTCAACCTTCCCAACTAACC	CGCAAACTAAACACCCTATC	48.7	402	Chr01:27028144-27028763
C-InDel9	TGTCAAATCGGTTATGATGG	TGTTCGTTGCTATGGGTGTT	49.6	600	Chr01:30602252-30603039
C-InDel10	CATTTATCCTCCCACCCTGTA	GTTTGTCCTCGTCCTTGGTT	54	645	Chr01:34127960-34128725
C-InDel11	TGTCATTAGCTGCCATACAG	AAATACATCCTCCTACCTTG	48.7	555	Chr01:37923249-37924270
C-InDel12	ATCTAGGACCAAATTAACGG	TAACTATGGAATTTCCCCAC	46.3	417	Chr01:41534707-41535345
C-InDel13	ACATGACACCCAAGGCTCAG	GATTTGCTGCCAATTACTCC	50.3	826	Chr02:1102062-1102994
C-InDel14	CAATGCCTGACGTATGAACT	TGACAAGGAGGAGAAGAACA	49.3	271	Chr02:5267228-5267737
C-InDel15	AGTGCTGCTGCCAATCTGTT	TTCTTGAACTCTACCGTCCTG	52.7	443	Chr02:9068339-9068956
C-InDel16	GATTCCTTGTCTTCCGTTCA	TTCTAAGTTTCTGGCCCATT	49.4	370	Chr02:12470206-12470723
C-InDel17	TTGTAGTGCCCAATAATCTG	ACTGCTCCGACCATGTAATC	46.3	251	Chr02:16170174-16170653
C-InDel18	ACGGATGGAGTAGGTAAGTT	TGGATTGTGACACCGCAAGA	49.7	386	Chr02:19726256-19726900
C-InDel19	TTATGGGCTACGACGCGGACTC	GCTGGTGCTGCCGTTGGTGA	61	418	Chr02:23389865-23390358
C-InDel20	TTTTACCTACTCGCCGTTCT	ATGCTGCTACATTTGGTTATAGTG	48.3	352	Chr02:27046470-27047063
C-InDel21	ACCTTCGGAGCCAGTTGAGG	CGTCGTGCCGTTGTCTTGTC	57	539	Chr02:30536165-30536817
C-InDel22	CAGACGACACCGACGACTTT	TGGAGGATCGTAACCAGGAA	55.4	639	Chr02:34290683-34291572
C-InDel23	GTATTTATGCGACATTGATT	AGCTTGCTGCTTGAGTGCTT	47.6	599	Chr03:1698582-1699253
C-InDel24	AATGAACCTAATCAGTACAGGGAA	ACGCCACTCTTGAGTTGCTAT	50.4	271	Chr03:4864949-4865441
C-InDel25	TTCCAGCCTCAGTAGTTTGT	GAGGATACATGATTGCGTAG	49.5	451	Chr03:8310252-8310914
C-InDel26	ACCGTATTTGATTCTTGGAC	ATAGGGTATTATGCTTCTGAGTG	50.9	369	Chr03:11590370-11590849
C-InDel27	TTAAACTGTGCCATGAAGAA	ATGTCACATTCAATACCACC	49.9	210	Chr03:15043464-15043932
C-InDel28	GAAGTACCAGGAGGACACTG	CCCAAGGGAAGATAATAAGA	47.9	277	Chr03:17872804-17873262
C-InDel29	CTTGGGTTACAGATAAACAT	AGCGGAACTGGTACAGATAG	48.9	631	Chr03:21542881-21543714
C-InDel30	CACTTGTGCAGGTTGCTGTT	TGTATGGAAATTGGGTAGCG	51.7	634	Chr03:25126187-25126924
C-InDel31	GTGCTTGATTTCTAGGGTTG	GGTAAACAAGGGAATTACGG	52.2	344	Chr03:28137435-28138057
C-InDel32	TAGGTTGATAGGGTCTGTTC	ATCTGATCGTGGATTCGTGT	48.5	556	Chr03:31483741-31484490
C-InDel33	AAGGCTCTGATGTATCTGTT	GTTCGGAATGTTCTTGAGTA	46.7	485	Chr03:34642542-34643150
C-InDel34	TAGCTGATCTCCGCACCTAG	CCATCTTCAAATTCATCGTAAT	48.3	943	Chr04:1363695-1364752
C-InDel35	GCCCACCAGCCTGCTACAAC	TCAGACAGCACAAAACATCG	51.5	470	Chr04:5380910-5381599
C-InDel36	CCTACTAGCAACCAGTGGCAAAC	AGGCGTGTAAACATAGATGGAGAA	51	559	Chr04:8523093-8523904
C-InDel37	GCTGCCAGACCTTAACCACA	TGCCAGAGCCTCCTTACCAT	53.6	575	Chr04:12406312-12407040
C-InDel38	CAGCCATCTTTGTTTCTCAG	AGCGACGAAGTCTAGCAATC	50	634	Chr04:15172086-15172842
C-InDel39	CATCGTCTGGGCAGAGGACA	CAAGCATCGTGGAAGGTGGC	55	628	Chr04:19506312-19507225
C-InDel40	AGAACCGTAGAGCCTCCCACT	AAACAATGCTCCATCCGTCT	50.1	379	Chr04:23624511-23625084
C-InDel41	GCCTACTACTTTCTTCCTCCAT	ACAGCTTCTCCGGCATCTCA	48.2	312	Chr04:27484138-27484682
C-InDel42	GCACGATGTATTTGCTCCTA	CCTACTATGCTCGCGTTCTT	50.5	414	Chr04:30184162-30184839
C-InDel43	CGAGGCCACCACTACTATTT	GCTACCCTTGACCTACCAAC	49.5	555	Chr04:33444260-33444897
C-InDel44	GAGGGACCTTCGGTGTACTTT	TTGGCATGACGCTTAGGGAG	53	882	Chr05:1838950-1839991
C-InDel45	GGTTGTCGTGCTCATCCTCC	TACCATTGCGGGTGCTCTAA	52.8	349	Chr05:5445862-5446354
C-InDel46	TAGAAGTGGGAAAGCGTAGT	TATAACCTGGAAATGAGCAG	48.9	833	Chr05:8696680-8697715
C-InDel47	GCTATCGGTCACCCAGGAGT	GTCCAGTAGCCGAAAGCATC	55.1	374	Chr05:12958611-12959263
C-InDel48	ACATATTTATGCCTCCTCCA	TCACTGCTTCCACCAGTTTA	49.7	925	Chr05:17059582-17060605
C-InDel49	CAAGTAGGTAATCCAACAAT	AAATAAAGCCAACATCATAG	45.8	340	Chr05:20608678-20609326
C-InDel50	TTGTCTTGTTTGAAGCCTAT	CGGTGATAATACCTCGGAAA	50	956	Chr05:24459581-24460810
C-InDel51	CGGGTTTGCCAACATCGTTT	TTCCTCTGCTTCGCCTCCTG	59	361	Chr05:28349725-28350185
C-InDel52	CTGGATCGGCGGTACGACAT	AAGAAACGGCCACCTCTTGG	52.4	556	Chr06:1673050-1673800
C-InDel53	GTCCTTTTCCATCACATCAA	GTATCCCATAAACAAGCAGT	480	441	Chr06:4916958-4917611
C-InDel54	AACTTGGTGGAGGCAAGAAA	ACAGGTATCCGGTGGACATT	51.7	524	Chr06:8597815-8598462
C-InDel55	ATAATTGTTAGTGGGTGATG	TGTTGGCTGATTTCTGAGTT	45.4	348	Chr06:12144868-12145346
C-InDel56	GAGAAAGGCAGGAATAGAAA	GGAGATACCCATACATCACAT	49.4	387	Chr06:15736124-15736673
C-InDel57	GCCCTGCTAACTTGTGGAAT	TGTGGTGATACGTTGTGGTC	50.2	429	Chr06:18822635-18823291
C-InDel58	CGACTCACTTGAACAAAGGAT	ACGGAAAACTGTGGATAGGATA	48.2	462	Chr06:22543544-22544121
C-InDel59	AATTTACTCGGAAAAGGAGA	CACATTAATAGGATAAAACAAGAA	48.3	1073	Chr06:26019547-26020915
C-InDel60	TGTTTTACTGTATTTTGGTG	AATCTAGATGAGGATGAACTCAGCG	45.7	514	Chr06:29515625 - 29516283
C-InDel61	ACCATTGTTGACGGTGAATT	TTTCTCGGAGCAGAGCATAG	50.1	394	Chr07:1696765-1697320
C-InDel62	ATGGGTGGTGATTTGATTGA	AGTGCCATGCTTTGACAATA	46.8	342	Chr07:5544047-5544525
C-InDel63	TTTACCCGAACGTAGGAACT	TCCGCACTAAATAAGCCATG	48.7	646	Chr07:8486356-8487177
C-InDel64	TAGTACGGCGAAACAGAGTG	TATTTAACTTGCCAACCACC	49.9	847	Chr07:11551767-11552829
C-InDel65	TTGAGGTAGACAACGACAAGGGTA	AGGACCACCACCGCCATCTT	58.3	675	Chr07:14761640-14762438
C-InDel66	CGATGATGGTGGTGCTGATA	TCCCGTTAAGAAGAATTACA	49.5	777	Chr07:18221517-18222460
C-InDel67	ACCAATATCCATCGACCTCA	CTGCCCTATCTTTGCTCACA	48.8	326	Chr07:21463574-21464139
C-InDel68	AAGAGGAAATGCAGGAGAAC	AACAACAGTGAACGACGAAA	52.2	891	Chr07:24807894-24808878
C-InDel69	AGGTGACGCATCCTGCTCCC	CTTGCCCGTGACAACTTGGT	58.5	266	Chr07:28219595-28220150
C-InDel70	AGAAGTTTAGGGACTGGAAT	ATCACCTTTATAGGGCATTT	47.7	537	Chr08:1726957-1727594
C-InDel71	TCCACGGCGAACTTCACCAC	AAAGCCAAACCCAGAAGCAG	53.6	364	Chr08:5279192-5279797
C-InDel72	CGTTGTAAAGCGGCAACGTT	GTTTGTTGGCTTGCTATTTT	55.7	990	Chr08:8808434-8809776
C-InDel73	CAGTGTATAGGATTACTAAAGGTT	AAGGGCTGAAATAGGAAAGT	50	507	Chr08:12179344-12179987
C-InDel74	GCTGTAATAGTAACGACCGA	GGAAGAAAATTCACCCCTCA	49.2	669	Chr08:15716341-15717242
C-InDel75	ATTTGAGCCATCATCCTTTA	GCTATTCTTTCCTTCATTCG	45.5	385	Chr08:23081960-23082876
C-InDel76	TTGTCGTCGTGACCTGCTTC	TCCTGCGATGATGGGTGATT	53.1	608	Chr08:23081960-23082876
C-InDel77	GATGAGAAGACGGCAGAAAC	TGGTTGACTTATGCCAGAGC	52.7	522	Chr08:26554497-26555090
C-InDel78	CAGAGGGTAAATAGGAGAAT	TATAGCAGTGCCATAAGAAT	47.5	345	Chr9:1331307-1331802
C-InDel79	AGATGTTATCGAGGGAAGAG	TATGGAAGTAGCAAATGGAC	46	499	Chr9:4999052-4999691
C-InDel80	ACTTAGCACGACTCCTACTCTA	ACTACTCCATTTGTCCCATT	48.3	973	Chr9:8697468-8698611
C-InDel81	CAATAAGCACGCATGGAGTT	ATTTATGCAGCATGTTGATC	47.4	487	Chr9:11458860-11459541
C-InDel82	AATGCAAAACGAGAAAATCA	AGCCTTACATCACCCATAGC	46.9	399	Chr9:14814875-14815376
C-InDel83	CGGTGGAAGGGCTCCACTCT	AAAATCAACGGCGTCATAAA	52.6	446	Chr9:18195280-18195968
C-InDel84	TTATGCTATGTCCGAGACCG	CTACAGGACGAGCCTATGGA	53.1	480	Chr9:21455658-21456236
C-InDel85	CCCACGACTCGATCAACACT	TTGCACCAAATTAGTTACCTCTAC	52.9	325	Chr10:1665100-1665593
C-InDel86	CCTGTCCTTGTTTTCCGTTT	GAAATATTCCATATGTGGATTT	47.9	477	Chr10:4865972-4866707
C-InDel87	TCAGAAAATAAAGTAGACGAGGAA	ACACGCCACATTGTAGCAGT	48.3	464	Chr10: 8598322-8599050
C-InDel88	ATTCATATTCCCCACCATGC	GGTGTTCGTTTCTACCGTGA	51	1157	Chr10:11558131-11559487
C-InDel89	AGTGAGGGAAAATAGGTAGC	GTACTGCTTAGTCTGTTTGGAG	53.1	820	Chr10:14796903-14797819
C-InDel90	AGCTTGAAAATGTTTGACTT	ATTACTGGAATCGTGTAAGG	47.9	314	Chr10:18231027-18231526
C-InDel91	AATCATCGTCGTCATTCCAC	CTTCATGTCTATACCGTGGG	50.4	736	Chr10:21672290-21673337
C-InDel92	ATATTGAACCACGGTGGAAA	CTGGCTTATGCTGATTTCTG	47.9	290	Chr11:1833238-1833780
C-InDel93	AGTGCAAAATTGCATCCTAA	TATTTGTTTGTGCATGACCC	52.2	919	Chr11:5484664-5485776
C-InDel94	TGGGCTGAAAGAATGAAAGA	GTGGATGGGCTGGAGTGGTT	50.9	455	Chr11:9052712-9053356
C-InDel95	AAGGTGCTGGGCTGGACTAAG	ATGGCATGACAGGTGAATCAAA	53.1	588	Chr11:12863260-12863819
C-InDel96	AGATAGCTTCGGCCTTCTTA	CTCCATCAAATAGCCAAACA	51.5	366	Chr11:16317779-16318454
C-InDel97	TTGCCCTTGAAGAAGATGAA	TAGGAAAGCAGTATTGGTGG	48.9	555	Chr11:19977287-19977918
C-InDel98	CTAATCTTTGGGCTGAGTGTT	CATCTCGCTGTTGGCTGTCG	54.7	661	Chr11:23692543-23693498
C-InDel99	AATAGATAACACTGCTTTCA	GTGATTAACAAACTTCCAAA	47.5	368	Chr11:27118423-27119056
C-InDel100	CCTTCTTGATGGGATGTTGG	AGGACTTGGAGGTTGGTGGG	53	411	Chr12:1525081-1525713
C-InDel101	GTCTCGCCACGACAACTACAT	CGTCCGTATTATTCCATTTCC	51.6	696	Chr12:4560495-4561703
C-InDel102	CATACTCTACGTCCAGAATACA	CATACTCCCTCAGTTCAAAA	49.4	284	Chr12:7557985-7558502
C-InDel103	TTTTACTCCCGCCCTTTTGA	TAGGTGCTTCGGTTCTGGTT	49.6	447	Chr12:10668664-10669410
C-InDel104	TTTTGCGGTGTTTATTGGAG	GCATGAAAGGGAATTTGACC	50.8	301	Chr12:13774394-13774845
C-InDel105	CGACGGCGGCTTTGATTAGG	ATGCGCTCCATTGCCACCAG	53.8	411	Chr12:16995386-16996114
C-InDel106	GACACGCACAAATCGAGAAA	CCTGAAGATCGCATCAAGAA	52.7	373	Chr12:19953846-19954362
C-InDel107	TTAAGCAAACGAGGGAACAT	GGACGGCTACTACCCAAATC	49	429	Chr12:22720500-22721114
C-InDel108	AAAAGTTGGGAGTTTGAAGA	GTGTTGAAACCTTAACTGAA	47.8	592	Chr12:25938331-25939100
